# Supplementary material for: Deciphering aromaticity in porphyrinoids via adaptive natural density partitioning
Source: Royal Society of Chemistry journal article supplement (doi:10.1039/c4ob01018c), 2014-01-01
Supplement: c4ob01018c1.pdf [file c4ob01018c1.pdf]

Supplementary Information for

## Deciphering Aromaticity in Porphyrinoids via Adaptive Natural Density Partitioning

Alexander S. Ivanov and Alexander I. Boldyrev

Department of Chemistry and Biochemistry, Utah State University, Logan, UT 84322, USA.

E-mail: a.i.boldyrev@usu.edu

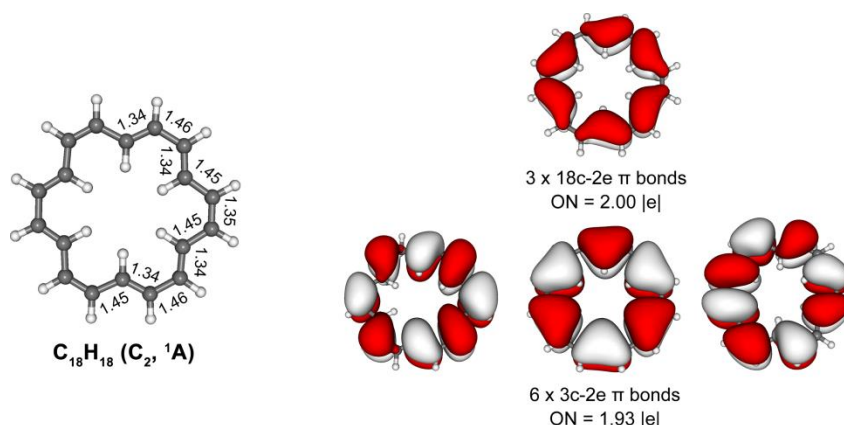

**Fig. S1.** AdNDP  $\pi$  bonding pattern for  $C_2$  symmetric bond-alternate [18]annulene. The corresponding point group symmetry and spectroscopic state are given in parenthesis.

- 1) Cartesian coordinates of  $C_2$  symmetric bond-alternate [18]annulene at the KMLYP/6-311++G\*\* level of theory:

```
C 0.00000000 3.585336000 -1.291759000
C 0.000366000 2.947313000 0.007624000
C 0.000163000 1.467028000 -2.555552000
C 0.000003000 2.911470000 -2.458641000
C -0.000366000 -2.947313000 0.007624000
C 0.000000000 -3.585336000 -1.291759000
C -0.000003000 -2.911470000 -2.458641000
C -0.000163000 -1.467028000 -2.555552000
C -0.000002000 -0.730306000 -3.675647000
C 0.000002000 0.730306000 -3.675647000
H -0.000073000 1.221100000 -4.644392000
H 0.000073000 -1.221100000 -4.644392000
H -0.000296000 4.671213000 -1.307621000
H -0.000286000 3.468013000 -3.391189000
H 0.000296000 -4.671213000 -1.307621000
H 0.000286000 -3.468013000 -3.391189000
C -0.000594000 3.549113000 1.205604000
C -0.000530000 2.818684000 2.470389000
C -0.000233000 1.480289000 2.547909000
H -0.001466000 4.633454000 1.264969000
H -0.000806000 3.412066000 3.379912000
C -0.000062000 0.673750000 3.750071000
```

|   |              |              |              |
|---|--------------|--------------|--------------|
| C | 0.000062000  | -0.673750000 | 3.750071000  |
| C | 0.000233000  | -1.480289000 | 2.547909000  |
| H | -0.000077000 | 1.202911000  | 4.698419000  |
| H | 0.000077000  | -1.202911000 | 4.698419000  |
| C | 0.000594000  | -3.549113000 | 1.205604000  |
| H | 0.001466000  | -4.633454000 | 1.264969000  |
| C | 0.000530000  | -2.818684000 | 2.470389000  |
| H | 0.000806000  | -3.412066000 | 3.379912000  |
| H | -0.000091000 | 0.927717000  | 1.618760000  |
| H | 0.001460000  | 1.866349000  | -0.006637000 |
| H | 0.000367000  | 0.939058000  | -1.612188000 |
| H | -0.000367000 | -0.939058000 | -1.612188000 |
| H | -0.001460000 | -1.866349000 | -0.006637000 |
| H | 0.000091000  | -0.927717000 | 1.618760000  |

2) Cartesian coordinates of all studied structures at the B3LYP/6-311++G\*\* level of theory:

### 1. $D_{6h}$ [18]annulene:

|   |              |              |             |
|---|--------------|--------------|-------------|
| C | 0.704854642  | -3.731579818 | 0.000000000 |
| C | 1.490460251  | -2.581552881 | 0.000000000 |
| C | -1.490460251 | -2.581552881 | 0.000000000 |
| C | -0.704854642 | -3.731579818 | 0.000000000 |
| C | -1.490460251 | 2.581552881  | 0.000000000 |
| C | -2.879215598 | 2.476211935  | 0.000000000 |
| C | -3.584070240 | 1.255367883  | 0.000000000 |
| C | -2.980920501 | 0.000000000  | 0.000000000 |
| C | -3.584070240 | -1.255367883 | 0.000000000 |
| C | -2.879215598 | -2.476211935 | 0.000000000 |
| H | -3.464561863 | -3.392226805 | 0.000000000 |
| H | -4.670035520 | -1.304285184 | 0.000000000 |
| H | 1.205473657  | -4.696511989 | 0.000000000 |
| H | -1.205473657 | -4.696511989 | 0.000000000 |
| H | -3.464561863 | 3.392226805  | 0.000000000 |
| H | -4.670035520 | 1.304285184  | 0.000000000 |
| C | 2.879215598  | -2.476211935 | 0.000000000 |
| C | 3.584070240  | -1.255367883 | 0.000000000 |
| C | 2.980920501  | 0.000000000  | 0.000000000 |
| H | 3.464561863  | -3.392226805 | 0.000000000 |
| H | 4.670035520  | -1.304285184 | 0.000000000 |
| C | 3.584070240  | 1.255367883  | 0.000000000 |
| C | 2.879215598  | 2.476211935  | 0.000000000 |
| C | 1.490460251  | 2.581552881  | 0.000000000 |
| H | 4.670035520  | 1.304285184  | 0.000000000 |
| H | 3.464561863  | 3.392226805  | 0.000000000 |
| C | -0.704854642 | 3.731579818  | 0.000000000 |
| H | -1.205473657 | 4.696511989  | 0.000000000 |
| C | 0.704854642  | 3.731579818  | 0.000000000 |
| H | 1.205473657  | 4.696511989  | 0.000000000 |
| H | 1.898442175  | 0.000000000  | 0.000000000 |
| H | 0.949221088  | -1.644099152 | 0.000000000 |
| H | -0.949221088 | -1.644099152 | 0.000000000 |
| H | -1.898442175 | 0.000000000  | 0.000000000 |
| H | -0.949221088 | 1.644099152  | 0.000000000 |
| H | 0.949221088  | 1.644099152  | 0.000000000 |

### 2. $D_{2h}$ dideazaporphyrin:

|   |             |              |              |
|---|-------------|--------------|--------------|
| H | 0.000000000 | 3.247268000  | 3.514902000  |
| N | 0.000000000 | 0.000000000  | 2.590165000  |
| N | 0.000000000 | 0.000000000  | -2.590165000 |
| C | 0.000000000 | -2.546625000 | 1.467606000  |
| C | 0.000000000 | -2.546625000 | -1.467606000 |
| C | 0.000000000 | 2.546625000  | 1.467606000  |
| C | 0.000000000 | 2.546625000  | -1.467606000 |
| C | 0.000000000 | -1.085426000 | 3.389771000  |
| C | 0.000000000 | 1.085426000  | 3.389771000  |
| C | 0.000000000 | -1.085426000 | -3.389771000 |
| C | 0.000000000 | 1.085426000  | -3.389771000 |
| C | 0.000000000 | -3.715550000 | 0.703013000  |

|   |            |             |             |
|---|------------|-------------|-------------|
| C | 0.00000000 | -3.71555000 | -0.70301300 |
| C | 0.00000000 | 3.71555000  | 0.70301300  |
| C | 0.00000000 | 3.71555000  | -0.70301300 |
| C | 0.00000000 | -0.68014200 | 4.79795400  |
| C | 0.00000000 | 0.68014200  | 4.79795400  |
| C | 0.00000000 | -0.68014200 | -4.79795400 |
| C | 0.00000000 | 0.68014200  | -4.79795400 |
| C | 0.00000000 | -2.39202300 | 2.84543200  |
| C | 0.00000000 | -2.39202300 | -2.84543200 |
| C | 0.00000000 | 2.39202300  | -2.84543200 |
| C | 0.00000000 | 2.39202300  | 2.84543200  |
| H | 0.00000000 | -4.67708100 | 1.21029400  |
| H | 0.00000000 | -4.67708100 | -1.21029400 |
| H | 0.00000000 | 4.67708100  | 1.21029400  |
| H | 0.00000000 | 4.67708100  | -1.21029400 |
| H | 0.00000000 | -1.34332300 | 5.65162600  |
| H | 0.00000000 | 1.34332300  | 5.65162600  |
| H | 0.00000000 | -1.34332300 | -5.65162600 |
| H | 0.00000000 | 1.34332300  | -5.65162600 |
| H | 0.00000000 | -3.24726800 | 3.51490200  |
| H | 0.00000000 | -3.24726800 | -3.51490200 |
| H | 0.00000000 | 3.24726800  | -3.51490200 |
| H | 0.00000000 | 3.24726800  | 3.51490200  |
| H | 0.00000000 | -1.60164700 | -0.94010700 |
| H | 0.00000000 | -1.60164700 | 0.94010700  |
| H | 0.00000000 | 1.60164700  | -0.94010700 |
| H | 0.00000000 | 1.60164700  | 0.94010700  |

### 3. $D_{2h}$ porphyrin:

|   |            |             |             |
|---|------------|-------------|-------------|
| H | 0.00000000 | 3.21480000  | 3.17762000  |
| N | 0.00000000 | 0.00000000  | -2.11314300 |
| N | 0.00000000 | 2.03465500  | 0.00000000  |
| N | 0.00000000 | 0.00000000  | 2.11314300  |
| N | 0.00000000 | -2.03465500 | 0.00000000  |
| C | 0.00000000 | 1.12911400  | -2.89124900 |
| C | 0.00000000 | -1.12911400 | -2.89124900 |
| C | 0.00000000 | 1.12911400  | 2.89124900  |
| C | 0.00000000 | -1.12911400 | 2.89124900  |
| C | 0.00000000 | 2.85617400  | -1.08533000 |
| C | 0.00000000 | 2.85617400  | 1.08533000  |
| C | 0.00000000 | -2.85617400 | -1.08533000 |
| C | 0.00000000 | -2.85617400 | 1.08533000  |
| C | 0.00000000 | 0.68535600  | -4.25469500 |
| C | 0.00000000 | -0.68535600 | -4.25469500 |
| C | 0.00000000 | 0.68535600  | 4.25469500  |
| C | 0.00000000 | -0.68535600 | 4.25469500  |
| C | 0.00000000 | 4.25751500  | -0.67750100 |
| C | 0.00000000 | 4.25751500  | 0.67750100  |
| C | 0.00000000 | -4.25751500 | -0.67750100 |
| C | 0.00000000 | -4.25751500 | 0.67750100  |
| C | 0.00000000 | 2.43922200  | -2.42017500 |
| C | 0.00000000 | -2.43922200 | -2.42017500 |
| C | 0.00000000 | -2.43922200 | 2.42017500  |
| C | 0.00000000 | 2.43922200  | 2.42017500  |
| H | 0.00000000 | 1.34386200  | -5.11006400 |
| H | 0.00000000 | -1.34386200 | -5.11006400 |
| H | 0.00000000 | 1.34386200  | 5.11006400  |
| H | 0.00000000 | -1.34386200 | 5.11006400  |
| H | 0.00000000 | 5.10580700  | -1.34716800 |
| H | 0.00000000 | 5.10580700  | 1.34716800  |
| H | 0.00000000 | -5.10580700 | -1.34716800 |
| H | 0.00000000 | -5.10580700 | 1.34716800  |
| H | 0.00000000 | 3.21480000  | -3.17762000 |
| H | 0.00000000 | -3.21480000 | -3.17762000 |
| H | 0.00000000 | -3.21480000 | 3.17762000  |
| H | 0.00000000 | 3.21480000  | 3.17762000  |
| H | 0.00000000 | 0.00000000  | -1.09934700 |
| H | 0.00000000 | 0.00000000  | 1.09934700  |

### 4. $C_{2v}$ dihydrodiazaporphyrin:

|   |             |             |             |
|---|-------------|-------------|-------------|
| H | -3.30392900 | 3.48919200  | -0.18977300 |
| N | 0.00000000  | 2.68408800  | -0.11780500 |
| N | 0.00000000  | -2.68408800 | -0.11780500 |
| C | 2.60453500  | 1.48691000  | 0.03077900  |

|   |              |              |              |
|---|--------------|--------------|--------------|
| C | 2.604535000  | -1.486910000 | 0.030779000  |
| C | -2.604535000 | 1.486910000  | 0.030779000  |
| C | -2.604535000 | -1.486910000 | 0.030779000  |
| C | 1.140804000  | 3.449603000  | 0.000209000  |
| C | -1.140804000 | 3.449603000  | 0.000209000  |
| C | 1.140804000  | -3.449603000 | 0.000209000  |
| C | -1.140804000 | -3.449603000 | 0.000209000  |
| C | 3.793844000  | 0.683830000  | -0.099848000 |
| C | 3.793844000  | -0.683830000 | -0.099848000 |
| C | -3.793844000 | 0.683830000  | -0.099848000 |
| C | -3.793844000 | -0.683830000 | -0.099848000 |
| C | 0.708844000  | 4.758431000  | 0.207991000  |
| C | -0.708844000 | 4.758431000  | 0.207991000  |
| C | 0.708844000  | -4.758431000 | 0.207991000  |
| C | -0.708844000 | -4.758431000 | 0.207991000  |
| C | 2.449322000  | 2.832110000  | -0.059931000 |
| C | 2.449322000  | -2.832110000 | -0.059931000 |
| C | -2.449322000 | 2.832110000  | -0.059931000 |
| C | -2.449322000 | -2.832110000 | -0.059931000 |
| H | 4.739914000  | 1.200674000  | -0.234634000 |
| H | 4.739914000  | -1.200674000 | -0.234634000 |
| H | -4.739914000 | 1.200674000  | -0.234634000 |
| H | -4.739914000 | -1.200674000 | -0.234634000 |
| H | 1.352014000  | 5.608596000  | 0.376530000  |
| H | -1.352014000 | 5.608596000  | 0.376530000  |
| H | 1.352014000  | -5.608596000 | 0.376530000  |
| H | -1.352014000 | -5.608596000 | 0.376530000  |
| H | 3.303929000  | 3.489192000  | -0.189773000 |
| H | 3.303929000  | -3.489192000 | -0.189773000 |
| H | -3.303929000 | 3.489192000  | -0.189773000 |
| H | 1.699352000  | -0.925937000 | 0.229799000  |
| H | 1.699352000  | 0.925937000  | 0.229799000  |
| H | -1.699352000 | -0.925937000 | 0.229799000  |
| H | -1.699352000 | 0.925937000  | 0.229799000  |
| H | 0.000000000  | -1.750859000 | -0.489615000 |
| H | 0.000000000  | 1.750859000  | -0.489615000 |
